# Supplementary material for: Analysis of frequency and severity of relapses in multiple sclerosis patients treated with cladribine tablets or placebo: The CLARITY and CLARITY Extension studies
Source: PubMed Central journal article supplement — Mult Scler. 2021 May 10;28(1):111–20. doi: 10.1177/13524585211010294 (PMC8688984; doi:10.1177/13524585211010294), 2021-05-10
Supplement: sj-pdf-1-msj-10.1177_13524585211010294.pdf [file sj-pdf-1-msj-10.1177_13524585211010294.pdf]

## Supplementary Material

**Supplementary Table 1: Covariate effects on the estimation of annualised relapse rates (qualifying and all) for overall and severe relapses (requiring steroid treatment or leading to hospitalisation) at Study Year 2 in CLARITY**

| <b>Covariate</b>            | <b>Covariate effect<br/>P value</b> | <b>Covariate interaction<br/>with treatment<br/>P value</b> |
|-----------------------------|-------------------------------------|-------------------------------------------------------------|
| <b>Qualifying relapses</b>  |                                     |                                                             |
| Age at time of MS diagnosis | 0.0011                              | 0.6013                                                      |
| Prior use of DMDs           | 0.0002                              | 0.2738                                                      |
| Disease duration            | 0.8770                              | 0.4104                                                      |
| Gender                      | 0.0783                              | 0.7193                                                      |
| Age at baseline             | 0.0025                              | 0.2911                                                      |
| <b>All relapses</b>         |                                     |                                                             |
| Age at time of MS diagnosis | 0.0096                              | 0.3420                                                      |
| Prior use of DMDs           | 0.0012                              | 0.7858                                                      |
| Disease duration            | 0.6667                              | 0.2035                                                      |
| Gender                      | 0.1538                              | 0.7388                                                      |
| Age at baseline             | 0.0244                              | 0.0843                                                      |

Inferential statistics were estimated using a Poisson regression model.
